# Supplementary material
Source: HighWire-hosted journal article supplement (https://mct.aacrjournals.org/content/suppl/2013/05/06/1535-7163.MCT-12-1107)
Supplement: fig1.pdf [file fig1.pdf]

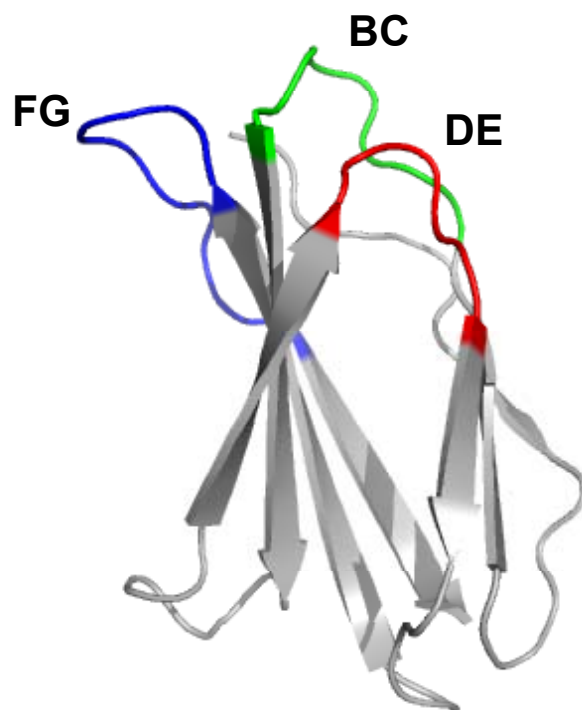

**Supplementary Figure S1:** Schematic Drawing of Tn3 scaffold protein. The three loop regions that are randomly mutated for generation of Tn3 libraries are labeled.
