# Supplementary material
Source: HighWire-hosted journal article supplement (https://mct.aacrjournals.org/content/suppl/2013/05/06/1535-7163.MCT-12-1107)
Supplement: fig4.pdf [file fig4.pdf]

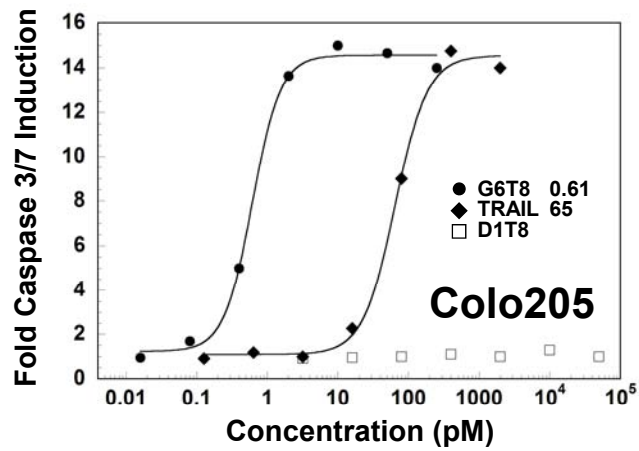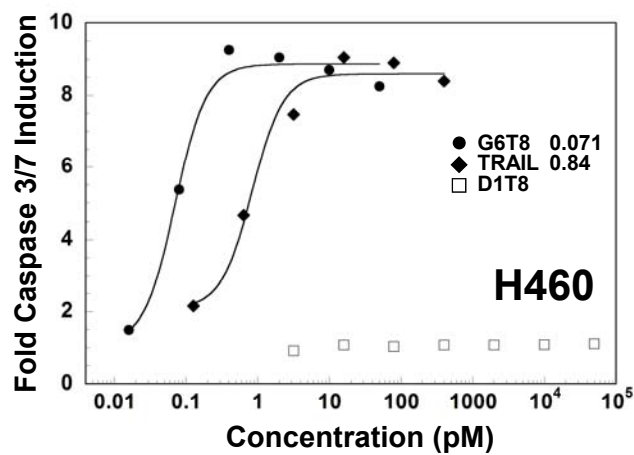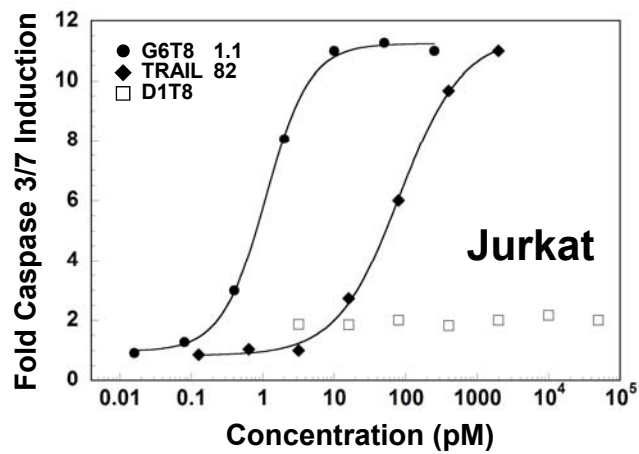

**Supplementary Figure S4:** Caspase activation by G6T8. TRAIL-sensitive cell lines were treated with G6T8, soluble TRAIL, or the negative control D1T8 for 6 hours, after which caspase 3 and 7 activity was measured in cell lysates. Data is reported as induction of caspase activity, that is, the ratio of activity in treated vs untreated cells. Concentrations of G6T8 and TRAIL (pM) that resulted in half-maximal caspase induction are shown within each graph.
